# Supplementary material for: National Trends in Hospital Readmission Rates among Medicare Fee-for-Service Survivors of Mitral Valve Surgery, 1999–2010
Source: PubMed Central journal article supplement (PMC4493110; doi:10.1371/journal.pone.0132470), 2015-07-06
Supplement: pone.0132470.s001.pdf [file pone.0132470.s001.pdf]

## **SUPPORTING INFORMATION**

S1 File. Trends in readmission rate among mitral valve surgery survivors at 1 year, 1999-2010 (Table A). Trends in 1-year readmission by surgical subtype among 1 year MVS survivors, 1999-2010 (Table B). Trends in mean total length of stay (within 1 year of discharge) among mitral valve surgery survivors at one year, 1999-2010 (Table C).

**Table A. Trends in readmission rate among mitral valve surgery survivors at 1 year, 1999-2010**

| <b>Description</b>                           | 1999                | 2000                | 2001                | 2002                | 2003                | 2004                | 2005                | 2006                | 2007                | 2008                | 2009                | 2010                |
|----------------------------------------------|---------------------|---------------------|---------------------|---------------------|---------------------|---------------------|---------------------|---------------------|---------------------|---------------------|---------------------|---------------------|
| <b>Full MVS Cohort</b>                       | N = 11,492          | N = 12,113          | N = 12,166          | N = 13,110          | N = 13,272          | N = 13,396          | N = 13,411          | N = 12,408          | N = 11,744          | N = 11,405          | N = 11,377          | N = 10,983          |
| At least one re-hospitalization, %, (95% CI) | 49.5<br>(48.6-50.4) | 50.2<br>(49.3-51.1) | 49.8<br>(48.9-50.7) | 50.5<br>(49.6-51.4) | 50.6<br>(49.7-51.4) | 50.8<br>(49.9-51.6) | 49.2<br>(48.3-50.0) | 48.3<br>(47.4-49.2) | 47.9<br>(47.0-48.8) | 49.0<br>(48.0-49.9) | 45.8<br>(44.9-46.7) | 46.9<br>(45.9-47.8) |
| By age                                       |                     |                     |                     |                     |                     |                     |                     |                     |                     |                     |                     |                     |
| 65-74                                        | 47.4<br>(46.1-48.7) | 48.0<br>(46.7-49.2) | 47.5<br>(46.3-48.8) | 48.8<br>(47.6-50.0) | 48.8<br>(47.6-50.1) | 48.2<br>(47.0-49.4) | 46.9<br>(45.7-48.1) | 45.5<br>(44.3-46.8) | 45.8<br>(44.5-47.1) | 46.4<br>(45.1-47.8) | 42.6<br>(41.3-44.0) | 44.4<br>(43.0-45.7) |
| 75-84                                        | 51.4<br>(50.1-52.8) | 52.3<br>(50.9-53.6) | 51.9<br>(50.6-53.2) | 52.1<br>(50.8-53.3) | 51.6<br>(50.4-52.9) | 52.7<br>(51.4-53.9) | 51.2<br>(49.9-52.4) | 50.6<br>(49.3-52.0) | 49.7<br>(48.3-51.0) | 50.7<br>(49.4-52.1) | 48.0<br>(46.6-49.3) | 49.2<br>(47.8-50.6) |
| ≥85                                          | 56.4<br>(51.5-61.2) | 55.5<br>(50.9-60.0) | 55.1<br>(50.5-59.7) | 55.1<br>(50.5-59.6) | 58.8<br>(54.7-62.9) | 58.5<br>(54.4-62.5) | 54.2<br>(50.2-58.2) | 53.7<br>(49.7-57.6) | 51.5<br>(47.5-55.6) | 56.4<br>(52.5-60.3) | 55.0<br>(51.2-58.7) | 50.0<br>(41.2-53.8) |
| By sex                                       |                     |                     |                     |                     |                     |                     |                     |                     |                     |                     |                     |                     |
| Female                                       | 51.7<br>(50.5-53.0) | 53.0<br>(51.8-54.2) | 52.1<br>(50.9-53.4) | 52.7<br>(51.5-53.9) | 52.7<br>(51.5-53.8) | 53.2<br>(52.0-54.4) | 51.6<br>(50.4-52.8) | 51.4<br>(50.1-52.6) | 50.6<br>(49.3-51.9) | 51.9<br>(50.6-53.2) | 49.1<br>(47.8-50.4) | 50.8<br>(49.5-52.1) |
| Male                                         | 46.9<br>(45.6-48.3) | 46.8<br>(45.5-48.2) | 47.1<br>(45.7-48.4) | 47.9<br>(46.7-49.2) | 48.3<br>(47.0-49.5) | 48.2<br>(47.0-49.4) | 46.8<br>(45.6-48.0) | 45.1<br>(43.9-46.4) | 45.2<br>(43.9-46.5) | 46.1<br>(44.8-47.4) | 42.4<br>(41.1-43.7) | 43.0<br>(41.7-44.3) |



|         |                     |                     |                     |                     |                     |                     |                     |                     |                     |                     |                     |                     |
|---------|---------------------|---------------------|---------------------|---------------------|---------------------|---------------------|---------------------|---------------------|---------------------|---------------------|---------------------|---------------------|
| Female  | 48.0<br>(46.1-49.8) | 50.2<br>(48.4-51.9) | 48.9<br>(47.1-50.6) | 49.5<br>(47.8-51.2) | 48.6<br>(46.8-50.3) | 50.1<br>(48.4-51.9) | 46.1<br>(44.3-47.9) | 47.5<br>(45.6-49.4) | 46.4<br>(44.5-48.3) | 47.5<br>(45.5-49.4) | 44.7<br>(42.9-46.6) | 47.6<br>(45.7-49.5) |
| Male    | 42.8<br>(40.6-45.0) | 44.1<br>(41.9-46.3) | 44.5<br>(42.3-46.6) | 43.6<br>(41.5-45.8) | 44.2<br>(42.1-46.3) | 45.0<br>(42.9-47.0) | 41.9<br>(39.9-43.9) | 40.6<br>(38.5-42.8) | 40.0<br>(37.9-42.2) | 41.9<br>(39.8-44.1) | 38.2<br>(36.2-40.3) | 37.2<br>(35.3-39.2) |
| By race |                     |                     |                     |                     |                     |                     |                     |                     |                     |                     |                     |                     |
| Black   | 55.2<br>(47.5-62.8) | 60.2<br>(53.2-66.9) | 59.0<br>(52.1-65.8) | 53.2<br>(46.6-59.8) | 60.1<br>(53.3-66.6) | 59.8<br>(53.3-65.9) | 51.5<br>(44.8-58.2) | 53.3<br>(46.3-60.1) | 53.7<br>(46.8-60.6) | 53.7<br>(47.0-60.4) | 54.5<br>(47.5-61.4) | 54.8<br>(48.0-61.6) |
| White   | 45.5<br>(44.0-46.9) | 47.1<br>(45.6-48.5) | 46.5<br>(45.1-48.0) | 46.7<br>(45.3-48.1) | 46.2<br>(44.8-47.6) | 47.1<br>(45.7-48.6) | 44.1<br>(42.7-45.6) | 44.1<br>(42.6-45.6) | 43.4<br>(41.7-44.6) | 44.5<br>(43.0-46.0) | 40.8<br>(39.4-42.3) | 42.1<br>(40.7-43.5) |
| Other   | 48.1<br>(40.2-56.1) | 56.8<br>(48.4-65.0) | 47.9<br>(39.4-56.5) | 51.5<br>(44.3-58.6) | 46.1<br>(38.7-53.7) | 53.0<br>(45.8-60.0) | 37.8<br>(30.8-45.2) | 46.6<br>(39.0-54.3) | 41.9<br>(34.6-49.5) | 46.9<br>(39.4-54.5) | 51.1<br>(44.4-57.8) | 47.0<br>(40.0-54.2) |

**Table B. Trends in 1-year readmission by surgical subtype among 1 year MVS survivors, 1999-2010**

|                | 1999  | 2000  | 2001  | 2002  | 2003  | 2004  | 2005  | 2006  | 2007  | 2008  | 2009  | 2010  |
|----------------|-------|-------|-------|-------|-------|-------|-------|-------|-------|-------|-------|-------|
| Bioprosthesis  | 51.4% | 52.9% | 52.4% | 53.3% | 52.4% | 52.1% | 51.3% | 51.1% | 50.7% | 53.1% | 50.8% | 50.5% |
| MV repair      | 46.5% | 45.7% | 47.2% | 47.9% | 48.7% | 48.8% | 46.4% | 45.6% | 44.7% | 45.0% | 40.7% | 42.3% |
| Mechanical MVR | 54.0% | 54.7% | 50.8% | 53.0% | 56.4% | 56.4% | 58.5% | 52.0% | 56.9% | 57.4% | 58.2% | 53.6% |

**Table C. Trends in mean total length of stay (within 1 year of discharge) among mitral valve surgery survivors at one year, 1999-2010**

| <b>Description</b>                | 1999           | 2000           | 2001            | 2002            | 2003            | 2004           | 2005            | 2006            | 2007           | 2008            | 2009            | 2010           |
|-----------------------------------|----------------|----------------|-----------------|-----------------|-----------------|----------------|-----------------|-----------------|----------------|-----------------|-----------------|----------------|
| <b>Full MVS Cohort</b>            | N = 11,492     | N = 12,113     | N = 12,166      | N = 13,110      | N = 13,272      | N = 13,396     | N = 13,411      | N = 12,408      | N = 11,744     | N = 11,405      | N = 11,377      | N = 10,983     |
| Mean days in hospital ( $\pm$ SD) | 6.2 $\pm$ 12.8 | 6.2 $\pm$ 12.4 | 6.1 $\pm$ 12.9  | 6.3 $\pm$ 12.7  | 6.2 $\pm$ 12.1  | 6.3 $\pm$ 12.8 | 5.9 $\pm$ 12.0  | 5.8 $\pm$ 11.8  | 5.6 $\pm$ 11.8 | 5.8 $\pm$ 12.1  | 5.3 $\pm$ 11.3  | 5.3 $\pm$ 11.7 |
| By age                            |                |                |                 |                 |                 |                |                 |                 |                |                 |                 |                |
| 65-74                             | 5.9 $\pm$ 13.3 | 5.8 $\pm$ 12.2 | 6.0 $\pm$ 13.5  | 6.0 $\pm$ 12.3  | 6.0 $\pm$ 12.3  | 6.1 $\pm$ 13.3 | 5.7 $\pm$ 12.2  | 5.4 $\pm$ 11.6  | 5.3 $\pm$ 11.8 | 5.5 $\pm$ 12.1  | 5.1 $\pm$ 11.8  | 5.0 $\pm$ 11.7 |
| 75-84                             | 6.4 $\pm$ 12.0 | 6.5 $\pm$ 12.6 | 6.2 $\pm$ 11.9  | 6.7 $\pm$ 13.2  | 6.3 $\pm$ 12.0  | 6.5 $\pm$ 12.3 | 6.2 $\pm$ 11.9  | 6.0 $\pm$ 11.8  | 5.9 $\pm$ 11.7 | 6.0 $\pm$ 12.0  | 5.3 $\pm$ 10.8  | 5.4 $\pm$ 11.6 |
| $\geq$ 85                         | 7.8 $\pm$ 14.1 | 6.8 $\pm$ 13.0 | 7.3 $\pm$ 16.1  | 6.7 $\pm$ 11.9  | 7.3 $\pm$ 11.8  | 7.0 $\pm$ 11.6 | 6.0 $\pm$ 9.3   | 7.1 $\pm$ 12.9  | 6.0 $\pm$ 11.6 | 7.0 $\pm$ 12.3  | 6.2 $\pm$ 11.2  | 6.2 $\pm$ 12.5 |
| By sex                            |                |                |                 |                 |                 |                |                 |                 |                |                 |                 |                |
| Female                            | 6.8 $\pm$ 13.2 | 6.7 $\pm$ 12.6 | 6.7 $\pm$ 13.5  | 7.0 $\pm$ 13.7  | 6.8 $\pm$ 12.5  | 7.1 $\pm$ 13.3 | 6.5 $\pm$ 12.4  | 6.5 $\pm$ 12.5  | 6.4 $\pm$ 12.5 | 6.8 $\pm$ 13.5  | 5.8 $\pm$ 11.7  | 5.9 $\pm$ 11.8 |
| Male                              | 5.5 $\pm$ 12.2 | 5.5 $\pm$ 12.2 | 5.5 $\pm$ 12.1  | 5.6 $\pm$ 11.4  | 5.6 $\pm$ 11.7  | 5.6 $\pm$ 12.1 | 5.3 $\pm$ 11.4  | 5.0 $\pm$ 11.0  | 4.8 $\pm$ 10.8 | 4.8 $\pm$ 10.3  | 4.8 $\pm$ 10.9  | 4.6 $\pm$ 11.5 |
| By race                           |                |                |                 |                 |                 |                |                 |                 |                |                 |                 |                |
| Black                             | 9.9 $\pm$ 17.3 | 9.5 $\pm$ 14.9 | 9.8 $\pm$ 16.4  | 11.2 $\pm$ 19.3 | 10.1 $\pm$ 17.1 | 9.4 $\pm$ 18.5 | 11.0 $\pm$ 19.8 | 10.4 $\pm$ 18.3 | 9.9 $\pm$ 17.4 | 10.2 $\pm$ 18.7 | 10.0 $\pm$ 16.8 | 9.7 $\pm$ 18.0 |
| White                             | 6.0 $\pm$ 12.4 | 6.0 $\pm$ 12.2 | 5.9 $\pm$ 12.6  | 6.0 $\pm$ 11.8  | 6.0 $\pm$ 11.8  | 6.1 $\pm$ 12.2 | 5.6 $\pm$ 11.2  | 5.5 $\pm$ 11.3  | 5.4 $\pm$ 11.4 | 5.5 $\pm$ 11.4  | 4.9 $\pm$ 10.6  | 5.0 $\pm$ 11.1 |
| Other                             | 7.7 $\pm$ 16.0 | 7.1 $\pm$ 15.6 | 7.7 $\pm$ 16.5) | 9.2 $\pm$ 21.0  | 6.7 $\pm$ 12.3  | 8.1 $\pm$ 17.6 | 7.6 $\pm$ 15.3  | 6.3 $\pm$ 11.8  | 5.4 $\pm$ 10.9 | 7.42 $\pm$ 15.0 | 7.9 $\pm$ 17.0  | 6.0 $\pm$ 13.7 |

| <b>Isolated MVS Cohort</b>        | N = 4946       | N = 5204        | N = 5154       | N = 5390        | N = 5377       | N = 5367       | N = 5287       | N = 4857       | N = 4790       | N = 4684       | N = 5011       | N = 5109       |
|-----------------------------------|----------------|-----------------|----------------|-----------------|----------------|----------------|----------------|----------------|----------------|----------------|----------------|----------------|
| Mean days in hospital ( $\pm$ SD) | 5.3 $\pm$ 11.5 | 5.7 $\pm$ 12.1  | 5.6 $\pm$ 11.7 | 5.6 $\pm$ 11.5  | 5.5 $\pm$ 11.1 | 5.5 $\pm$ 11.3 | 4.8 $\pm$ 10.9 | 4.8 $\pm$ 10.7 | 4.8 $\pm$ 10.8 | 4.9 $\pm$ 10.5 | 4.2 $\pm$ 9.3  | 4.4 $\pm$ 9.5  |
| By age                            |                |                 |                |                 |                |                |                |                |                |                |                |                |
| 65-74                             | 5.1 $\pm$ 12.0 | 5.4 $\pm$ 12.3  | 5.3 $\pm$ 12.2 | 5.2 $\pm$ 10.7  | 5.1 $\pm$ 10.7 | 5.2 $\pm$ 11.5 | 4.4 $\pm$ 10.7 | 4.2 $\pm$ 10.0 | 4.5 $\pm$ 10.9 | 4.3 $\pm$ 10.1 | 3.9 $\pm$ 9.6  | 4.0 $\pm$ 9.5  |
| 75-84                             | 5.4 $\pm$ 10.7 | 6.0 $\pm$ 11.7  | 5.7 $\pm$ 10.4 | 6.0 $\pm$ 12.4  | 5.7 $\pm$ 11.3 | 5.9 $\pm$ 11.1 | 5.2 $\pm$ 11.4 | 5.3 $\pm$ 10.7 | 5.0 $\pm$ 10.4 | 5.2 $\pm$ 10.5 | 4.5 $\pm$ 8.7  | 4.8 $\pm$ 9.7  |
| $\geq$ 85                         | 7.5 $\pm$ 11.6 | 6.3 $\pm$ 13.6  | 8.4 $\pm$ 17.4 | 6.9 $\pm$ 12.5  | 7.7 $\pm$ 12.9 | 5.7 $\pm$ 11.1 | 5.9 $\pm$ 9.5  | 7.9 $\pm$ 16.8 | 5.9 $\pm$ 14.7 | 7.2 $\pm$ 12.9 | 5.7 $\pm$ 9.5  | 5.2 $\pm$ 8.6  |
| By sex                            |                |                 |                |                 |                |                |                |                |                |                |                |                |
| Female                            | 5.8 $\pm$ 11.9 | 6.0 $\pm$ 11.6  | 6.0 $\pm$ 12.6 | 6.1 $\pm$ 11.6  | 6.0 $\pm$ 11.4 | 6.0 $\pm$ 11.3 | 5.1 $\pm$ 11.0 | 5.6 $\pm$ 11.6 | 5.4 $\pm$ 11.4 | 5.6 $\pm$ 11.3 | 4.6 $\pm$ 9.5  | 5.2 $\pm$ 10.4 |
| Male                              | 4.6 $\pm$ 10.8 | 5.1 $\pm$ 12.8  | 4.9 $\pm$ 10.2 | 4.9 $\pm$ 11.4  | 4.8 $\pm$ 10.6 | 4.9 $\pm$ 11.2 | 4.4 $\pm$ 10.9 | 3.8 $\pm$ 9.1  | 3.9 $\pm$ 10.1 | 4.0 $\pm$ 9.4  | 3.7 $\pm$ 9.0  | 3.4 $\pm$ 8.3  |
| By race                           |                |                 |                |                 |                |                |                |                |                |                |                |                |
| Black                             | 9.6 $\pm$ 16.9 | 10.1 $\pm$ 17.3 | 8.8 $\pm$ 16.1 | 10.3 $\pm$ 21.2 | 9.8 $\pm$ 15.9 | 8.2 $\pm$ 14.3 | 8.9 $\pm$ 16.8 | 9.0 $\pm$ 17.6 | 9.0 $\pm$ 15.4 | 9.0 $\pm$ 17.3 | 9.2 $\pm$ 15.9 | 8.0 $\pm$ 16.5 |
| White                             | 5.2 $\pm$ 11.3 | 5.4 $\pm$ 11.7  | 5.4 $\pm$ 11.5 | 5.3 $\pm$ 10.6  | 5.3 $\pm$ 10.8 | 5.3 $\pm$ 11.1 | 4.6 $\pm$ 10.4 | 4.6 $\pm$ 10.2 | 4.6 $\pm$ 10.6 | 4.6 $\pm$ 9.6  | 3.9 $\pm$ 8.6  | 4.1 $\pm$ 8.8  |
| Other                             | 5.3 $\pm$ 10.6 | 7.7 $\pm$ 12.8  | 5.5 $\pm$ 10.4 | 7.9 $\pm$ 16.4  | 5.0 $\pm$ 9.4  | 6.3 $\pm$ 12.7 | 4.9 $\pm$ 13.5 | 5.2 $\pm$ 10.9 | 4.5 $\pm$ 9.1  | 7.3 $\pm$ 15.9 | 6.6 $\pm$ 11.8 | 6.5 $\pm$ 12.9 |
